# Supplementary material for: The Mental Health Parity and Addiction Equity Act (MHPAEA) Evaluation Study: Impact on Quantitative Treatment Limits
Source: Atypon-hosted journal article supplement (doi:10.1176/appi.ps.201600110), 2016-12-15
Supplement: appi.ps.201600110.ds001.pdf [file appi.ps.201600110.ds001.pdf]

## Supplemental Web Appendices

**Figure A1. Sample flow-chart: number of plan-years, plans, and employers remaining after each sample inclusion criterion, carve-out plans**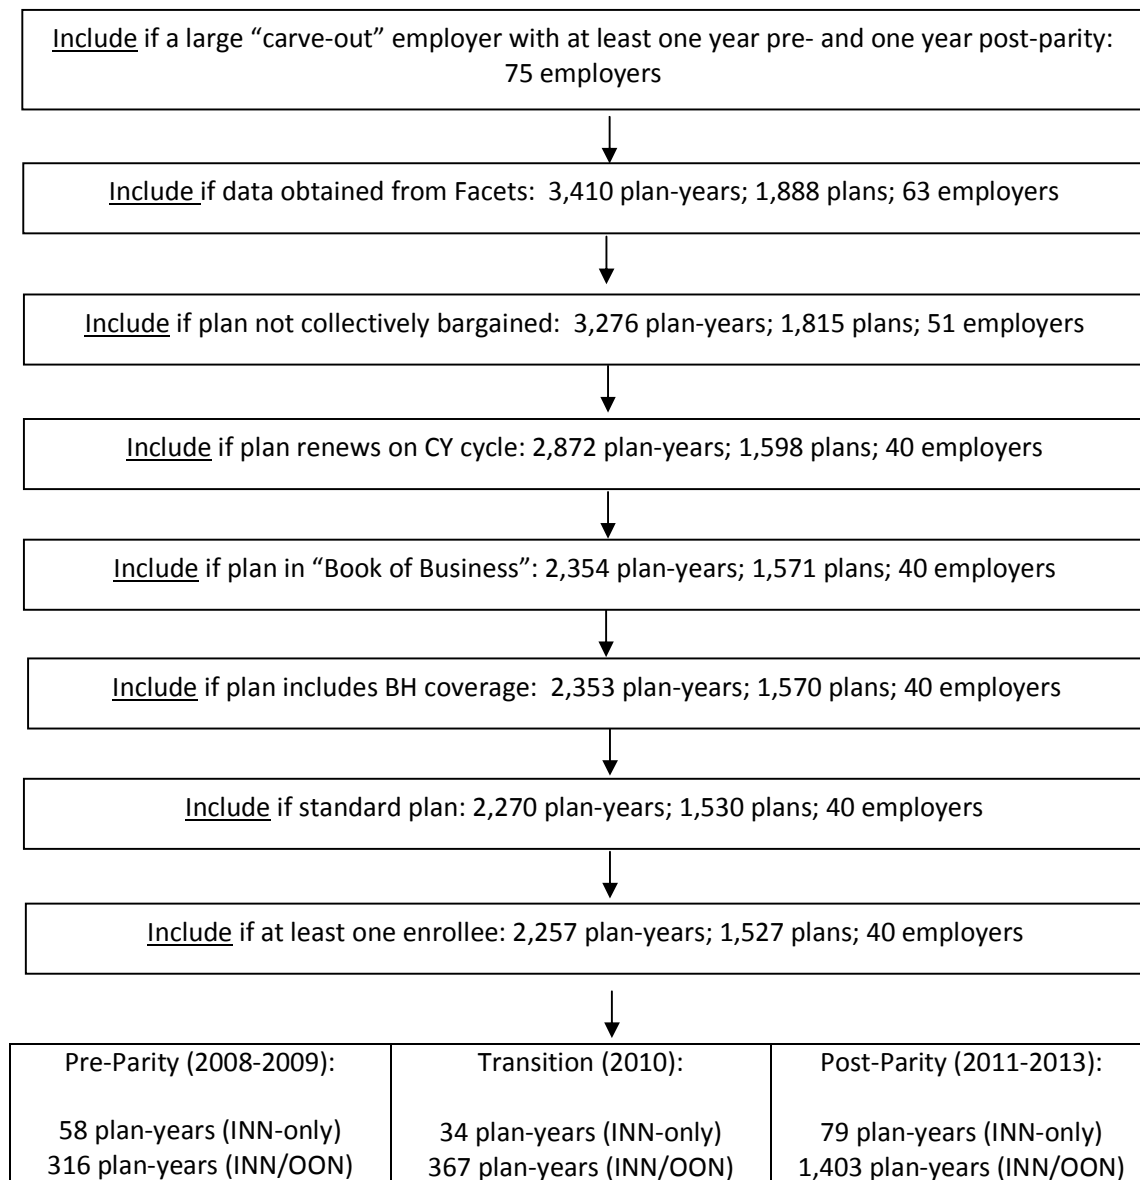

Note. CY: Calendar Year; BOB: Book of Business; BH: Behavioral health; INN: In-network benefits; OON: Out-of-network benefits. For longitudinal sample, an additional criteria was imposed to only include employers with plans in all three time periods. This led to a total of 1113 plan-years; 806 plans; 32 employers, of which 56/268 (INN-only/INN&OON) were pre-parity, 31/194 transition, and 55/509 post parity.

**Figure A2. Sample flow-chart: number of plan-years, plans, and employers remaining after each sample inclusion criterion, carve-in plans**

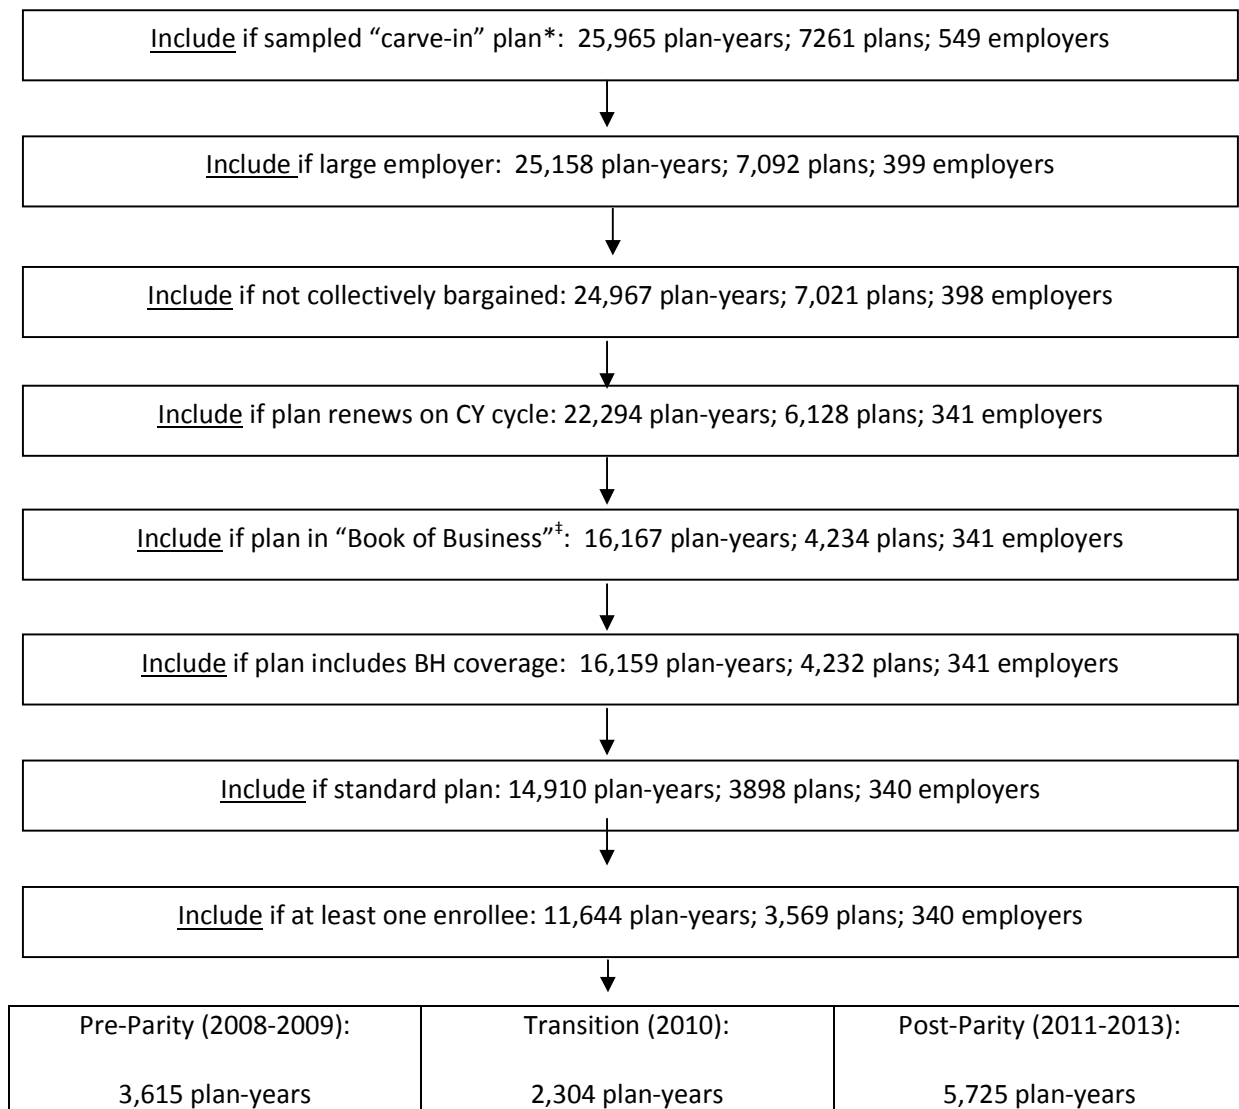

Note. CY: Calendar Year; BH: Behavioral health. For the longitudinal sample, an additional criteria was imposed to only include plans that existed in all three time periods. This led to a total of 6,586 plan-years; 1,287 plans; 234 employers-- 2,194 pre-parity, 1,287 transition, and 3,105 post-parity.

\* The initial carve-in sample included employer groups who were in Optum’s Book of Business during 2009 and/or during at least one year pre-parity (2008-9) and at least one year post-parity (defined as 2010-12 at the time the sample was drawn). We then excluded 12 employers whose benefit design data was not available in the TOPs database.

† The majority of plans not included in the Book of Business had no enrollees

**Table A1. MHPAEA-Related Changes to Mental Health and SUD Services Covered, Carve-Out Plans that did not cover specific services**

| Type of Service               | Plans with in-network benefits only<br>(N=171 plan-years) |   |            |      |   | Plans with In- and out-of-Network Benefits<br>(N=2086 plan-years) |   |            |      |    |                         |   |            |      |  |
|-------------------------------|-----------------------------------------------------------|---|------------|------|---|-------------------------------------------------------------------|---|------------|------|----|-------------------------|---|------------|------|--|
|                               | In-Network Benefits                                       |   |            |      |   | In-Network Benefits                                               |   |            |      |    | Out-of-Network Benefits |   |            |      |  |
|                               | Pre                                                       |   | Transition | Post |   | Pre                                                               |   | Transition | Post |    | Pre                     |   | Transition | Post |  |
|                               | N                                                         | % | N          | N    | N | %                                                                 | N | %          | N    | N  | %                       | N | %          | N    |  |
| Outpatient psychotherapy      |                                                           |   |            |      |   |                                                                   |   |            |      |    |                         |   |            |      |  |
| <i>Mental Health</i>          | 0                                                         | 0 | 0          | 0    | 0 | 0                                                                 | 0 | 0          | 0    | 2  | 1                       | 0 | 0          | 0    |  |
| <i>Substance Use Disorder</i> | 0                                                         | 0 | 0          | 0    | 1 | < 1                                                               | 0 | 0          | 0    | 1  | < 1                     | 0 | 0          | 0    |  |
| Medication management         |                                                           |   |            |      |   |                                                                   |   |            |      |    |                         |   |            |      |  |
| <i>Mental Health</i>          | 0                                                         | 0 | 0          | 0    | 0 | 0                                                                 | 0 | 0          | 0    | 2  | 1                       | 0 | 0          | 0    |  |
| <i>Substance Use Disorder</i> | 0                                                         | 0 | 0          | 0    | 1 | < 1                                                               | 0 | 0          | 0    | 1  | < 1                     | 0 | 0          | 0    |  |
| Residential Treatment         |                                                           |   |            |      |   |                                                                   |   |            |      |    |                         |   |            |      |  |
| <i>Mental Health</i>          | 1                                                         | 2 | 0          | 0    | 4 | 1                                                                 | 3 | 1          | 0    | 13 | 4                       | 5 | 1          | 0    |  |
| <i>Substance Use Disorder</i> | 2                                                         | 4 | 0          | 0    | 5 | 2                                                                 | 3 | 1          | 0    | 14 | 4                       | 5 | 1          | 0    |  |
| Inpatient hospitalization     |                                                           |   |            |      |   |                                                                   |   |            |      |    |                         |   |            |      |  |
| <i>Mental Health</i>          | 0                                                         | 0 | 0          | 0    | 0 | 0                                                                 | 0 | 0          | 0    | 6  | 2                       | 0 | 0          | 0    |  |
| <i>Substance Use Disorder</i> | 2                                                         | 4 | 0          | 0    | 2 | 1                                                                 | 0 | 0          | 0    | 8  | 3                       | 0 | 0          | 0    |  |

Note. Pre = 2008 and 2009; Transition = 2010, Post = 2011-2013.

**Table A2. Employer and Plan Characteristics**

| <b>Employer Characteristics</b>                                          | <b>Carve-Out<br/>(N=40 employers)</b> |          | <b>Carve-In<br/>(N=340 employers)</b> |          |
|--------------------------------------------------------------------------|---------------------------------------|----------|---------------------------------------|----------|
|                                                                          | <b>n</b>                              | <b>%</b> | <b>n</b>                              | <b>%</b> |
| Average number of enrolled employees                                     |                                       |          |                                       |          |
| >40,000                                                                  | 7                                     | 18       | 8                                     | 2        |
| 10,001 - 40,000                                                          | 15                                    | 38       | 68                                    | 20       |
| 5,000 - 10,000                                                           | 9                                     | 23       | 68                                    | 20       |
| <5,000                                                                   | 9                                     | 23       | 196                                   | 58       |
| Employer Industry                                                        |                                       |          |                                       |          |
| Accommodation and Food Services                                          | 2                                     | 5        | 7                                     | 2        |
| Administrative and Support and Waste Management and Remediation Services | 0                                     | 0        | 2                                     | 1        |
| Agriculture, Forestry, Fishing and Hunting                               | 0                                     | 0        | 1                                     | 0        |
| Arts, Entertainment, and Recreation                                      | 0                                     | 0        | 7                                     | 2        |
| Construction                                                             | 0                                     | 0        | 8                                     | 2        |
| Educational Services                                                     | 0                                     | 0        | 7                                     | 2        |
| Finance and Insurance                                                    | 6                                     | 15       | 44                                    | 13       |
| Health Care and Social Assistance                                        | 3                                     | 8        | 14                                    | 4        |
| Information                                                              | 4                                     | 10       | 28                                    | 8        |
| Management of Companies and Enterprises                                  | 0                                     | 0        | 2                                     | 1        |
| Manufacturing                                                            | 9                                     | 23       | 100                                   | 29       |
| Mining, Quarrying, and Oil and Gas Extraction                            | 0                                     | 0        | 12                                    | 4        |
| Other Services (except Public Administration)                            | 0                                     | 0        | 8                                     | 2        |
| Professional, Scientific, and Technical Services                         | 6                                     | 15       | 31                                    | 9        |
| Public Administration                                                    | 3                                     | 8        | 4                                     | 1        |
| Real Estate Rental and Leasing                                           | 0                                     | 0        | 4                                     | 1        |
| Retail Trade                                                             | 3                                     | 8        | 19                                    | 6        |
| Transportation and Warehousing                                           | 2                                     | 5        | 15                                    | 4        |
| Utilities                                                                | 2                                     | 5        | 15                                    | 4        |
| Wholesale Trade                                                          | 0                                     | 0        | 12                                    | 4        |
| Census division                                                          |                                       |          |                                       |          |
| New England                                                              | 3                                     | 8        | 18                                    | 5        |
| Middle Atlantic                                                          | 5                                     | 13       | 60                                    | 18       |
| East North Central                                                       | 8                                     | 20       | 51                                    | 15       |
| West North Central                                                       | 1                                     | 3        | 27                                    | 8        |
| South Atlantic                                                           | 3                                     | 8        | 47                                    | 14       |
| East South Central                                                       | 2                                     | 5        | 8                                     | 2        |
| West South Central                                                       | 5                                     | 13       | 69                                    | 20       |
| Mountain                                                                 | 0                                     | 0        | 13                                    | 4        |
| Pacific                                                                  | 13                                    | 33       | 44                                    | 13       |
| Unknown                                                                  | 0                                     | 0        | 3                                     | 1        |

| Plan Characteristics                  | Carve-Out<br>(N=1,527 plans) |    | Carve-In<br>(N=3,569 plans) |    |
|---------------------------------------|------------------------------|----|-----------------------------|----|
|                                       | N                            | %  | n                           | %  |
| Plan Type                             |                              |    |                             |    |
| Preferred Provider Organization (PPO) | 1,251                        | 82 | 981                         | 27 |
| Point of Service (POS)                | 147                          | 10 | 2,211                       | 62 |
| Exclusive Provider Organization (EPO) | 125                          | 8  | 306                         | 9  |
| Managed Indemnity                     | 0                            | 0  | 71                          | 2  |
| Other                                 | 4                            | 0  | 0                           | 0  |
| Funding                               |                              |    |                             |    |
| Administrative Services Only (ASO)    | 1,385                        | 91 | 3,445                       | 97 |
| Fully Insured (FI)                    | 142                          | 9  | 124                         | 3  |

**Table A3. Summary of Associations of MHPAEA with Changes in Percent of Plans with any BH Annual Limits, Longitudinal Sample Only**

| Any Annual Limits                                                              | Pre-Parity<br>(2008-09) |          | Transition<br>(2010) |          | Post-Parity<br>(2011-13) |          | P-value | 2009 enrollees<br>affected |          |
|--------------------------------------------------------------------------------|-------------------------|----------|----------------------|----------|--------------------------|----------|---------|----------------------------|----------|
| <b>Carve-Out Plans with In- and Out-of-Network Benefits (N=971 plan-years)</b> | <b>n</b>                | <b>%</b> | <b>n</b>             | <b>%</b> | <b>n</b>                 | <b>%</b> |         | <b>n</b>                   | <b>%</b> |
| Inpatient or Intermediate*                                                     | 165                     | 62       | 22                   | 11       | 3                        | 1        | <.001   | 528,882                    | 56       |
| Outpatient visits                                                              | 234                     | 87       | 24                   | 12       | 3                        | <1       | <.001   | 712,953                    | 76       |
| <b>Carve-Out Plans with In-Network Benefits Only (N=142 plan-years)</b>        | <b>n</b>                | <b>%</b> | <b>n</b>             | <b>%</b> | <b>n</b>                 | <b>%</b> |         | <b>n</b>                   | <b>%</b> |
| Inpatient or Intermediate*                                                     | 43                      | 77       | 1                    | 3        | 0                        | 0        | <.001   | 137,419                    | 69       |
| Outpatient visits                                                              | 52                      | 93       | 5                    | 16       | 0                        | 0        | <.001   | 148,512                    | 75       |
| <b>Carve-In Plans (N = 6,586 plan-years)</b>                                   | <b>n</b>                | <b>%</b> | <b>n</b>             | <b>%</b> | <b>n</b>                 | <b>%</b> |         | <b>n</b>                   | <b>%</b> |
| Inpatient or Intermediate*                                                     | 1576                    | 72       | 69                   | 5        | 104                      | 3        | <.001   | 1,920,306                  | 69       |
| Outpatient visits                                                              | 1692                    | 77       | 76                   | 6        | 110                      | 4        | <.001   | 2,119,933                  | 76       |

Notes: P-values are from Fisher's Exact Test. Plan years were included in the counts here if the plan had any limit for the relevant level of care, for MH and/or SUD.-Carve-out enrollees in in-and out-of-network plans = 942,885; in-network only plans = 197,739. Carve-in total enrollees = 2,782,470.

<sup>1</sup> Of these 971 total plan-years, 268 were in the pre-parity, 194 in the transition, and 509 in the post-parity period.

<sup>2</sup> Of these 142 total plan-years, 56 were in the pre-parity, 31 in the transition, and 55 in the post-parity period.

<sup>3</sup> Of these 6,586 total plan-years, 2,194 were in the pre-parity, 1,287 in the transition, and 3,105 in the post-parity period.

\* Intermediate care accumulates against the inpatient limit using standard substitution of benefits ratios: 1 inpatient day = 1.5 residential treatment days, 2 day treatment/partial hospital days, 5 structured outpatient treatment days, or 10 sober living/transitional living days



| Substance Use Disorder only                          | 2                                | 1  | 0                             | 0 | 0                                 | 0 | .116        | 2                                                       | 2-2      | 14,829                     | 2  |
|------------------------------------------------------|----------------------------------|----|-------------------------------|---|-----------------------------------|---|-------------|---------------------------------------------------------|----------|----------------------------|----|
| <i>All services courses of treatment, lifetime</i>   |                                  |    |                               |   |                                   |   |             |                                                         |          |                            |    |
| Substance Use Disorder only                          | 25                               | 9  | 0                             | 0 | 0                                 | 0 | <.001       | 2                                                       | 2-2      | 115,420                    | 12 |
|                                                      | Pre-Parity<br>(2008-09)<br>N=268 |    | Transition<br>(2010)<br>N=194 |   | Post-Parity<br>(2011-13)<br>N=509 |   | P-<br>value | Pre-Parity Limit,<br>among plans with<br>relevant limit |          | 2009 enrollees<br>affected |    |
| In-Network, Specific Limit Types                     | n                                | %  | n                             | % | n                                 | % |             | Median                                                  | Min, Max | n                          | %  |
| <i>Inpatient hospital days, annual</i>               |                                  |    |                               |   |                                   |   |             |                                                         |          |                            |    |
| BH combined                                          | 1                                | 0  | 1                             | 1 | 0                                 | 0 | .226        | 60                                                      | 60-60    | 123                        | 0  |
| Mental Health only                                   | 1                                | 0  | 1                             | 1 | 0                                 | 0 | .226        | 60                                                      | 60-60    | 123                        | 0  |
| SUD only                                             | 2                                | 1  | 2                             | 1 | 0                                 | 0 | .067        | 60                                                      | 60-60    | 894                        | 0  |
| <i>Inpatient days per admission</i>                  |                                  |    |                               |   |                                   |   |             |                                                         |          |                            |    |
| SUD only                                             | 1                                | 0  | 0                             | 0 | 0                                 | 0 | .476        | 3                                                       | 3-3      | 789                        | 0  |
| <i>Inpatient or Intermediate days, annual</i>        |                                  |    |                               |   |                                   |   |             |                                                         |          |                            |    |
| Mental Health only                                   | 2                                | 1  | 0                             | 0 | 0                                 | 0 | .116        | 45                                                      | 45-45    | 273                        | 0  |
| Substance Use Disorder only                          | 2                                | 1  | 0                             | 0 | 0                                 | 0 | .116        | 28                                                      | 28-28    | 273                        | 0  |
| <i>Inpatient / Intermediate admissions, lifetime</i> |                                  |    |                               |   |                                   |   |             |                                                         |          |                            |    |
| Substance Use Disorder only                          | 4                                | 2  | 0                             | 0 | 0                                 | 0 | .007        | 2                                                       | 2-2      | 17,669                     | 2  |
| <i>Outpatient visits, annual</i>                     |                                  |    |                               |   |                                   |   |             |                                                         |          |                            |    |
| BH combined                                          | 2                                | 1  | 0                             | 0 | 0                                 | 0 | .116        | 40                                                      | 40-40    | 797                        | 0  |
| Mental Health only                                   | 1                                | 0  | 0                             | 0 | 0                                 | 0 | .476        | 35                                                      | 35-35    | 0                          | 0  |
| Substance Use Disorder only                          | 1                                | 0  | 0                             | 0 | 0                                 | 0 | .476        | 35                                                      | 35-35    | 0                          | 0  |
| <b>Out of Network, Specific Limit Types</b>          |                                  |    |                               |   |                                   |   |             |                                                         |          |                            |    |
| <i>Inpatient hospital days, annual</i>               |                                  |    |                               |   |                                   |   |             |                                                         |          |                            |    |
| BH combined                                          | 1                                | 0  | 1                             | 1 | 0                                 | 0 | .226        | 30                                                      | 30-30    | 123                        | 0  |
| Mental Health only                                   | 2                                | 1  | 2                             | 1 | 0                                 | 0 | .067        | 60                                                      | 60-60    | 894                        | 0  |
| Substance Use Disorder only                          | 2                                | 1  | 2                             | 1 | 0                                 | 0 | .067        | 30                                                      | 30-30    | 894                        | 0  |
| <i>Inpatient or Intermediate days, annual</i>        |                                  |    |                               |   |                                   |   |             |                                                         |          |                            |    |
| BH combined                                          | 28                               | 10 | 7                             | 4 | 3                                 | 1 | <.001       | 30                                                      | 20-50    | 310,004                    | 33 |
| Mental Health only                                   | 2                                | 1  | 0                             | 0 | 0                                 | 0 | .116        | 30                                                      | 30-30    | 273                        | 0  |
| Substance Use Disorder only                          | 2                                | 1  | 0                             | 0 | 0                                 | 0 | .116        | 6                                                       | 6-6      | 273                        | 0  |
| <i>Inpatient / Intermediate admissions, lifetime</i> |                                  |    |                               |   |                                   |   |             |                                                         |          |                            |    |
| Substance Use Disorder only                          | 12                               | 5  | 2                             | 1 | 0                                 | 0 | <.001       | 2                                                       | 1-2      | 107,293                    | 11 |



|                                                                                |                                 |    |                             |    |                                  |   |             |                                                             |             |                            |    |
|--------------------------------------------------------------------------------|---------------------------------|----|-----------------------------|----|----------------------------------|---|-------------|-------------------------------------------------------------|-------------|----------------------------|----|
| <i>Outpatient visits, annual</i>                                               |                                 |    |                             |    |                                  |   |             |                                                             |             |                            |    |
| BH combined                                                                    | 96                              | 36 | 13                          | 7  | 3                                | 1 | <.001       | 50                                                          | 10-100      | 510,696                    | 54 |
| Mental Health only                                                             | 10                              | 4  | 2                           | 1  | 0                                | 0 | <.001       | 20                                                          | 17-28       | 30,748                     | 3  |
| Substance Use Disorder only                                                    | 8                               | 3  | 0                           | 0  | 0                                | 0 | <.001       | 22.5                                                        | 17-28       | 25,693                     | 3  |
| Plans with In-Network Benefits Only<br>(N=142 plan-years), Specific Limit Type | Pre-Parity<br>(2008-09)<br>N=56 |    | Transition<br>-2010<br>N=31 |    | Post-Parity<br>(2011-13)<br>N=55 |   | P-<br>value | Pre-Parity Limit,<br>among plans with<br>the relevant limit |             | 2009 enrollees<br>affected |    |
|                                                                                | n                               | %  | n                           | %  | n                                | % |             | Median                                                      | Min,<br>Max | n                          | %  |
| <i>Inpatient or Intermediate days, annual</i>                                  |                                 |    |                             |    |                                  |   |             |                                                             |             |                            |    |
| BH combined                                                                    | 39                              | 70 | 1                           | 3  | 0                                | 0 | <.001       | 30                                                          | 20-50       | 126,853                    | 64 |
| Mental Health only                                                             | 4                               | 7  | 0                           | 0  | 0                                | 0 | .076        | 45.5                                                        | 31-60       | 10,566                     | 5  |
| Substance Use Disorder only                                                    | 2                               | 4  | 0                           | 0  | 0                                | 0 | .349        | 45                                                          | 45-45       | 5                          | 0  |
| <i>Inpatient or Intermediate days, lifetime</i>                                |                                 |    |                             |    |                                  |   |             |                                                             |             |                            |    |
| BH combined                                                                    | 4                               | 7  | 0                           | 0  | 0                                | 0 | .076        | 75                                                          | 60-90       | 9,346                      | 5  |
| <i>Inpatient or Intermediate courses, lifetime</i>                             |                                 |    |                             |    |                                  |   |             |                                                             |             |                            |    |
| Substance Use Disorder only                                                    | 9                               | 16 | 4                           | 13 | 0                                | 0 | .003        | 2                                                           | 2-2         | 11,093                     | 6  |
| <i>Outpatient visits, annual</i>                                               |                                 |    |                             |    |                                  |   |             |                                                             |             |                            |    |
| BH combined                                                                    | 40                              | 71 | 1                           | 3  | 0                                | 0 | <.001       | 40                                                          | 20-50       | 126,853                    | 64 |
| Mental Health only                                                             | 12                              | 21 | 4                           | 13 | 0                                | 0 | <.001       | 27.5                                                        | 20-30       | 21,659                     | 11 |
| Substance Use Disorder only                                                    | 2                               | 4  | 0                           | 0  | 0                                | 0 | .349        | 20                                                          | 20-20       | 5                          | 0  |
| <i>Outpatient courses, lifetime</i>                                            |                                 |    |                             |    |                                  |   |             |                                                             |             |                            |    |
| Substance Use Disorder only                                                    | 8                               | 14 | 4                           | 13 | 0                                | 0 | .004        | 2                                                           | 2-2         | 11,093                     | 6  |
| <i>All services courses, lifetime</i>                                          |                                 |    |                             |    |                                  |   |             |                                                             |             |                            |    |
| Substance Use Disorder only                                                    | 2                               | 4  | 0                           | 0  | 0                                | 0 | .349        | 2                                                           | 2-2         | 8,872                      | 4  |

Note: P-values are from Fisher's Exact Test. The table does not include rows for types of limits that did not exist in the data (e.g., annual admission limits for any level of care, INN). Carve-out enrollees in in-and out-of-network plans = 942,885; in-network only plans = 197,739.

\*Statistics unavailable; P-value unavailable when no plan in any study period has the given limit type. Median, min, max, and enrollees affected unavailable when no plans have the given limit in the pre-parity period.

**Table A5. Associations of MHPAEA with Changes in the Percent of Plans with BH Quantitative Treatment Limits, Carve-In Longitudinal Sample**

| Limit Type                                            | Pre-Parity<br>(2008-09)<br>N=2,194 |    | Transition<br>(2010)<br>N=1,287 |    | Post-Parity<br>(2011-13)<br>N=3,105 |    | P-value | Pre-Parity Limit,<br>among plans with<br>relevant limit |          | 2009 enrollees<br>affected |    |
|-------------------------------------------------------|------------------------------------|----|---------------------------------|----|-------------------------------------|----|---------|---------------------------------------------------------|----------|----------------------------|----|
|                                                       | n                                  | %  | n                               | %  | n                                   | %  |         | Median                                                  | Min, Max | n                          | %  |
| <i>Inpatient or intermediate days, annual</i>         | 947                                | 43 | 36                              | 3  | 61                                  | 2  | <.001   | 30                                                      | 7, 175   | 1,086,375                  | 39 |
| BH combined                                           | 606                                | 28 | 31                              | 2  | 42                                  | 1  | <.001   | 30                                                      | 8, 165   | 831,989                    | 30 |
| Mental Health only                                    | 485                                | 22 | 12                              | 1  | 19                                  | <1 | <.001   | 30                                                      | 7, 183   | 592,876                    | 21 |
| Substance Use Disorder only                           |                                    |    |                                 |    |                                     |    |         |                                                         |          |                            |    |
| <i>Inpatient or intermediate days, lifetime</i>       | 122                                | 6  | 2                               | <1 | 2                                   | <1 | <.001   | 90                                                      | 30, 190  | 201,158                    | 7  |
| BH combined                                           | 24                                 | 1  | 3                               | <1 | 4                                   | <1 | <.001   | 95                                                      | 45, 150  | 48,472                     | 2  |
| Mental Health only                                    | 122                                | 5  | 10                              | 1  | 3                                   | <1 | <.001   | 60                                                      | 10, 120  | 150,955                    | 5  |
| Substance Use Disorder only                           |                                    |    |                                 |    |                                     |    |         |                                                         |          |                            |    |
| <i>Inpatient or intermediate admissions, lifetime</i> |                                    |    |                                 |    |                                     |    |         |                                                         |          |                            |    |
| Substance Use Disorder only                           | 2                                  | <1 | 1                               | <1 | 1                                   | <1 | .145    | 2                                                       | 2, 2     | 8                          | 0  |
| <i>Inpatient or intermediate days per admission</i>   |                                    |    |                                 |    |                                     |    |         |                                                         |          |                            |    |
| BH combined                                           | 25                                 | 1  | 9                               | <1 | 13                                  | <1 | <.001   | 30                                                      | 30, 45   | 9,533                      | 0  |
| Substance Use Disorder only                           | 14                                 | <1 | 5                               | <1 | 12                                  | <1 | <.001   | 7                                                       | 7, 28    | 3,063                      | 0  |
| <i>Outpatient visits, annual</i>                      | 1118                               | 51 | 54                              | 4  | 78                                  | 3  | <.001   | 30                                                      | 3, 60    | 1,283,634                  | 46 |
| BH combined                                           | 574                                | 26 | 23                              | 2  | 34                                  | 1  | <.001   | 30                                                      | 5, 60    | 821,218                    | 30 |
| Mental Health only                                    | 448                                | 20 | 17                              | 1  | 20                                  | <1 | <.001   | 30                                                      | 10, 120  | 548,647                    | 20 |
| Substance Use Disorder only                           |                                    |    |                                 |    |                                     |    |         |                                                         |          |                            |    |
| <i>Outpatient visits, lifetime</i>                    | 45                                 | 2  | 0                               | 0  | 0                                   | 0  | <.001   | 150                                                     | 30, 400  | 111,660                    | 4  |
| BH combined                                           | 2                                  | <1 | 0                               | 0  | 0                                   | 0  | .111    | 90                                                      | 90, 90   | 1,866                      | 0  |
| Mental Health only                                    | 80                                 | 4  | 2                               | <1 | 4                                   | <1 | <.001   | 60                                                      | 20, 120  | 91,706                     | 3  |
| Substance Use Disorder only                           |                                    |    |                                 |    |                                     |    |         |                                                         |          |                            |    |

Note: P-values are from Fisher's Exact Test. The table does not include rows for types of limits that did not exist in the data. For carve-in plans, limits were always combined INN and OON network (if there were OON benefits). Total 2009 enrollees for all carve-in plans = 2,782,470.
